# Supplementary material for: Promotion of cell proliferation by the proto‐oncogene DEK enhances oral squamous cell carcinogenesis through field cancerization
Source: PubMed Central journal article supplement (PMC5633549; doi:10.1002/cam4.1157), 2017-08-23
Supplement: CAM4-6-2424-s001.pdf [file CAM4-6-2424-s001.pdf]

## Supplemental Fig. 1

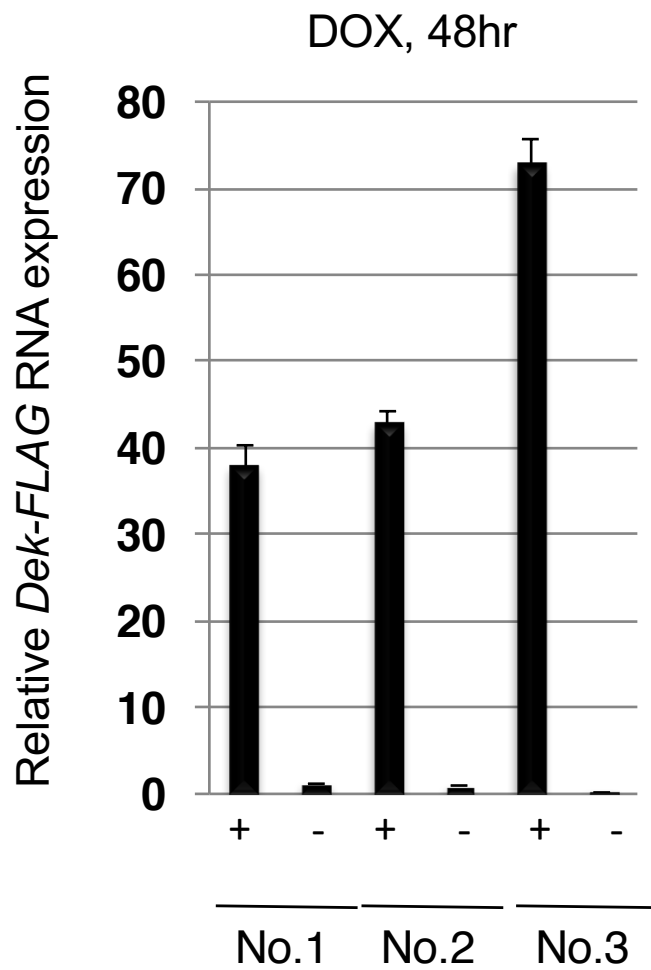

**Supplementary Fig.1: *Dek-FLAG* (exogenous) expression induced by DOX increased in three DOX-inducible *Dek-FLAG* KH2 ES clones.**

Relative *Dek-FLAG* RNA expression in three DOX-inducible *Dek-FLAG* KH2 ES clones. Data is averages  $\pm$  SD.

## Supplemental Fig. 2

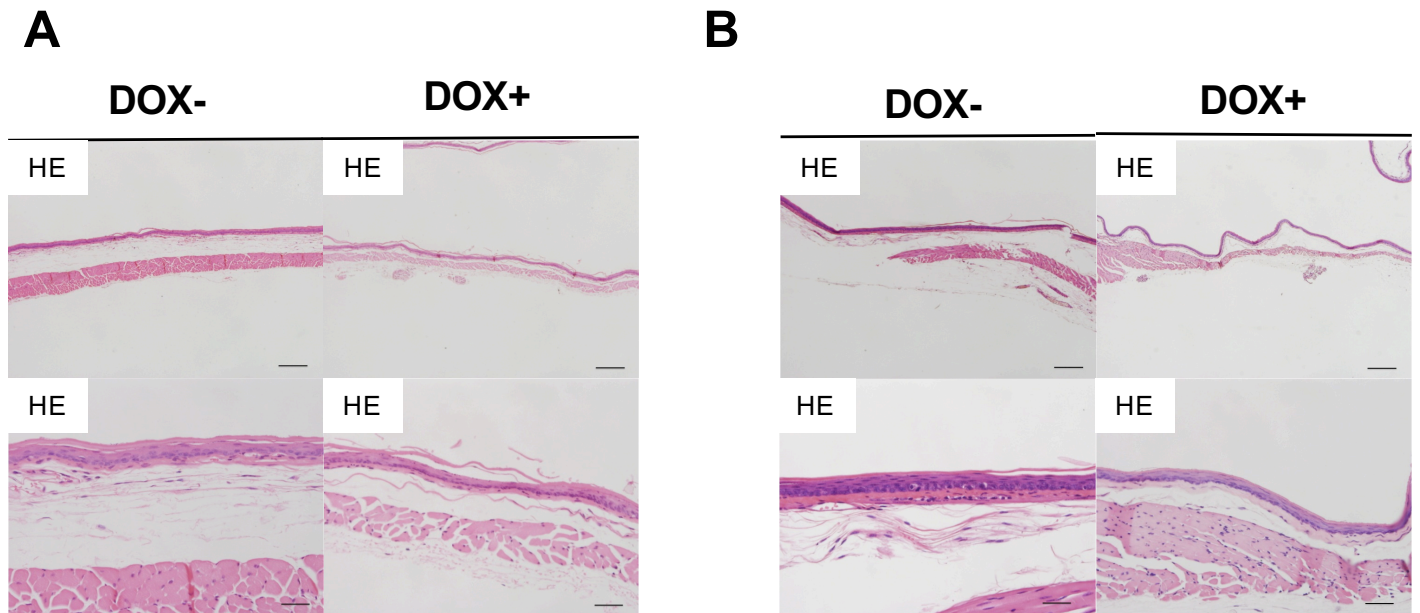

### Supplemental Fig.2: No difference between DOX+ and DOX- *iDek* mice in esophagus.

(A) The HE sections in the esophagus of DOX+ and DOX- *iDek* mice (Rosa26-rtTA/TetO-*Dek* mice)

(B) The HE sections in the esophagus of DOX+ and DOX- *iDek-e* mice (Krt14-Cre/LSL-rtTA-ires-GFP/TetO-*Dek* mice)

Scale bars, 200µm at upper photos, 40µm at lower photos.

## Supplementary Fig.S3

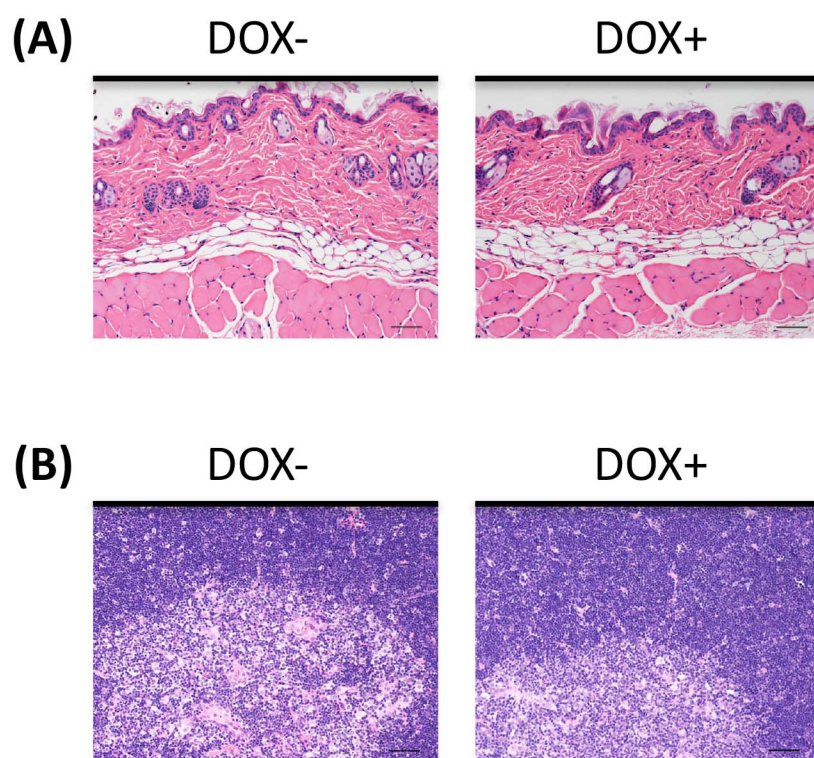

**Supplementary Fig.S3:** No difference between DOX+ and DOX- *iDek* mice in skin and thymus after treatment with DOX(1mg/L) for 2 weeks.

(A) The HE sections in the skin of DOX+ and DOX- *iDek* mice (*Rosa26-rtTA/TetO-Dek* mice) (B) The HE sections in the thymus of DOX+ and DOX- *iDek* mice (*Rosa26-rtTA/TetO-Dek* mice) Scale bars, 40 $\mu$ m at each photos.

## Supplemental Fig. 4

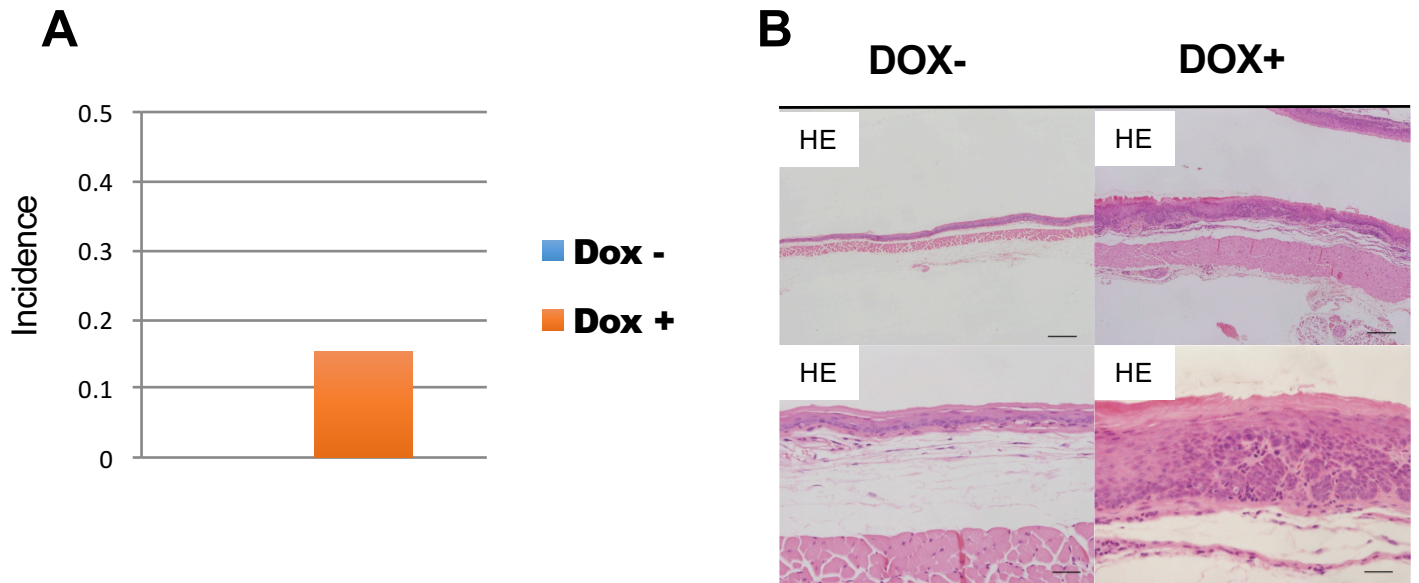

### Supplemental Fig.3: The high frequency of esophagus tumors in DOX+ and DOX- *iDek* mice.

(A) Incidence of macroscopic tumors of the esophagus in DOX+ and DOX- *iDek* mice treated by 4NQO.

(B) The HE sections in the esophagus of DOX+ and DOX- mice. DOX+ *iDek* mice developed squamous cell carcinoma in the esophagus, but DOX- *iDek* mice did not.

Scale bars, 200µm at upper photos, 40µm at lower photos.

## Supplemental Fig. 5

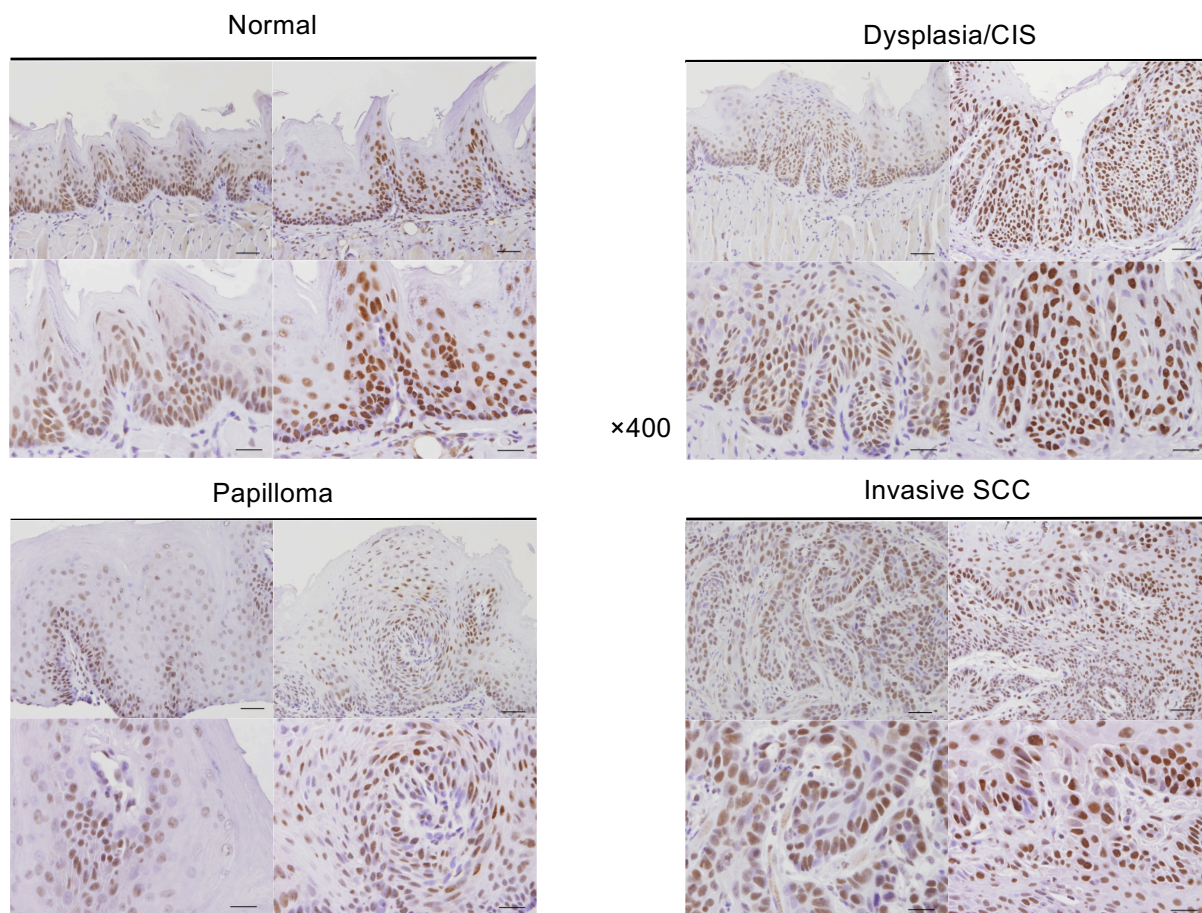

**Supplemental Fig. 4: DEK expression increased in the 4NQO- tongue carcinogenesis in both DOX+ and DOX- *iDek* mice.**

Representative photos of DEK staining in the tongue lesions of DOX- and DOX+ *iDek* mouse. *Scale bars*, 40 $\mu$ m.

*Scale bars*, 200 $\mu$ m at upper photos, 40 $\mu$ m at lower photos.

## Supplemental Fig. 6

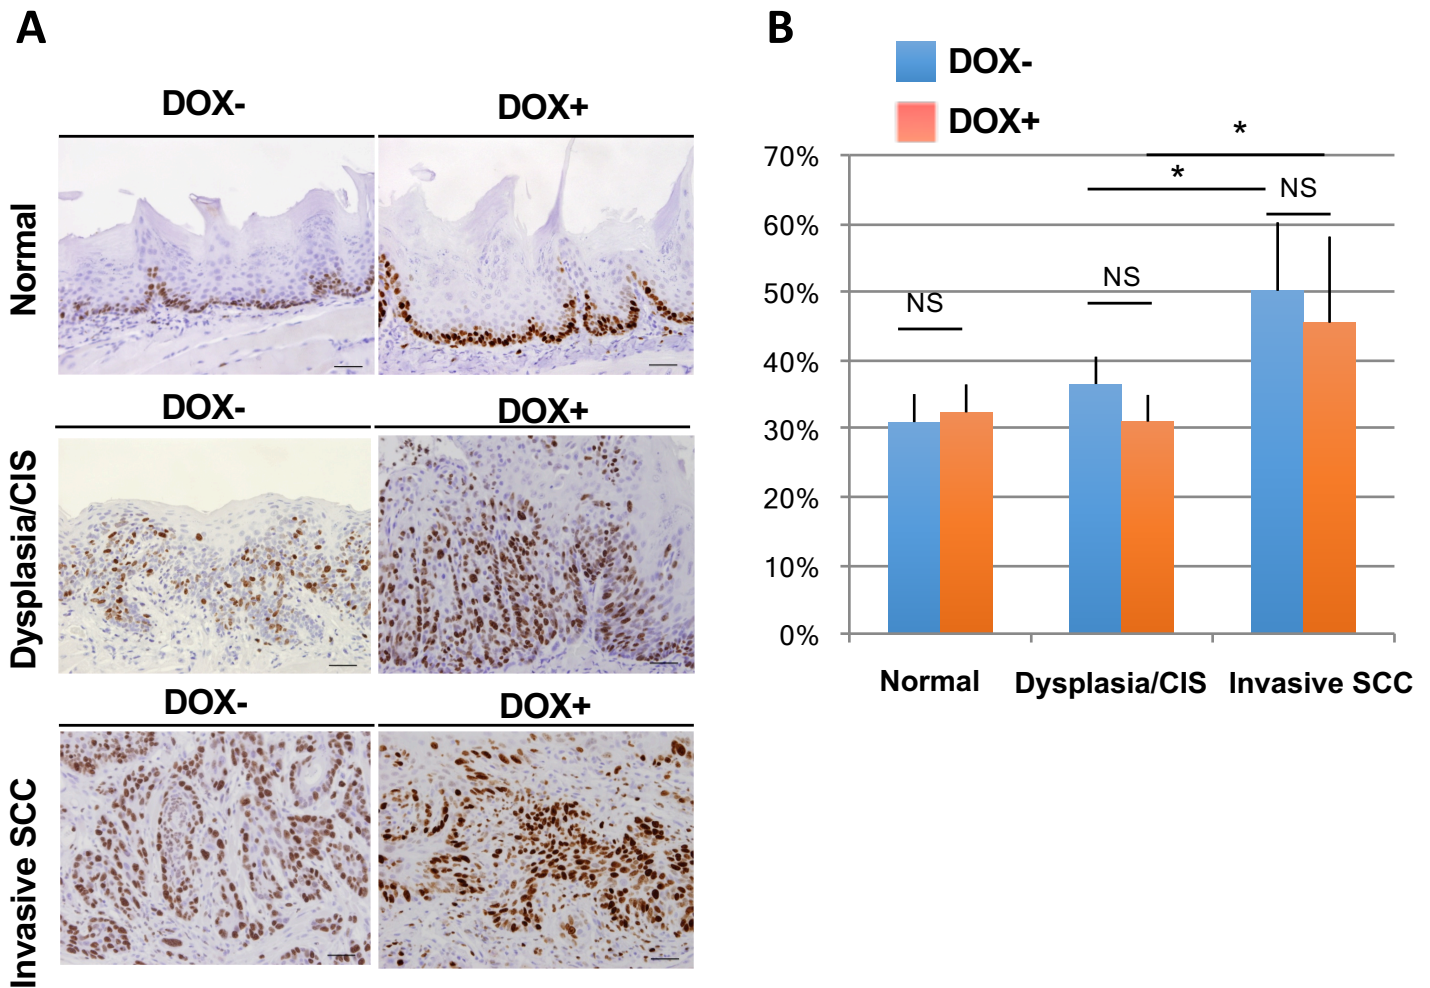

**Supplemental Fig.5: Ki67 proliferation marker increased in the tongue carcinogenesis in both DOX+ and DOX- *iDek* mice, but showed no significant difference between DOX+ and DOX- *iDek* mice.**

**(A)** Representative photos of Ki67 staining in the tongue lesions of DOX- and DOX+ *iDek* mouse. *Scale bars*, 40 $\mu$ m.

**(B)** The Ki67 positive index in tongue lesions of DOX+ and DOX- *iDek* mice treated by 4NQO. NS, Not Significant. Data are averages  $\pm$  SD. \* $P < 0.05$ . NS, Not significant.

# Supplementary Fig.S7

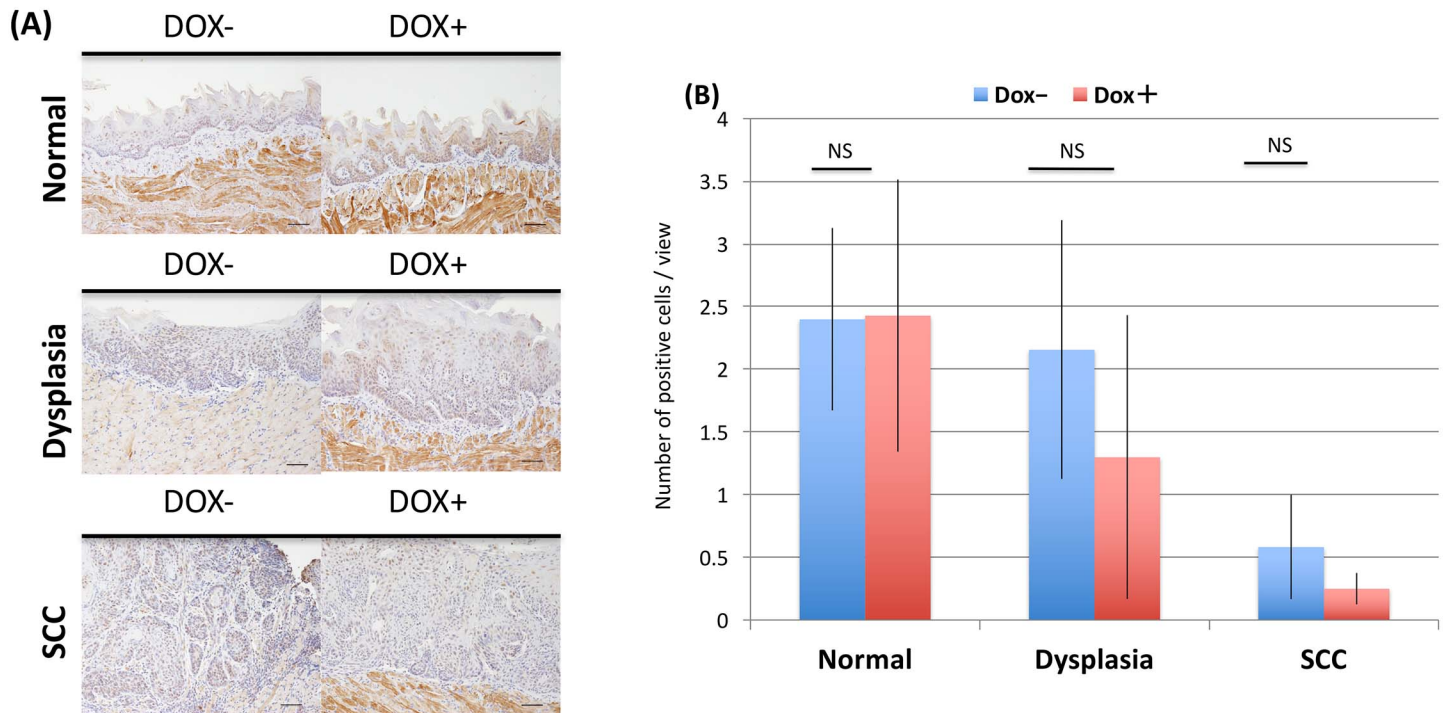

**Supplementary Fig.S7:** No difference between p53 positive cells in tongue lesions of DOX+ and DOX- iDek mice.

(A) Representative photos of P53 staining in the tongue lesions of DOX- and DOX+ *iDek* mouse. Scale bars, 40 $\mu$ m. (B) P53 positive cells in tongue lesions of DOX+ and DOX- *iDek* mice treated by 4NQO. Data are averages  $\pm$ SD. \* $P < 0.05$ . NS, Not significant.

## Supplementary Fig.S8

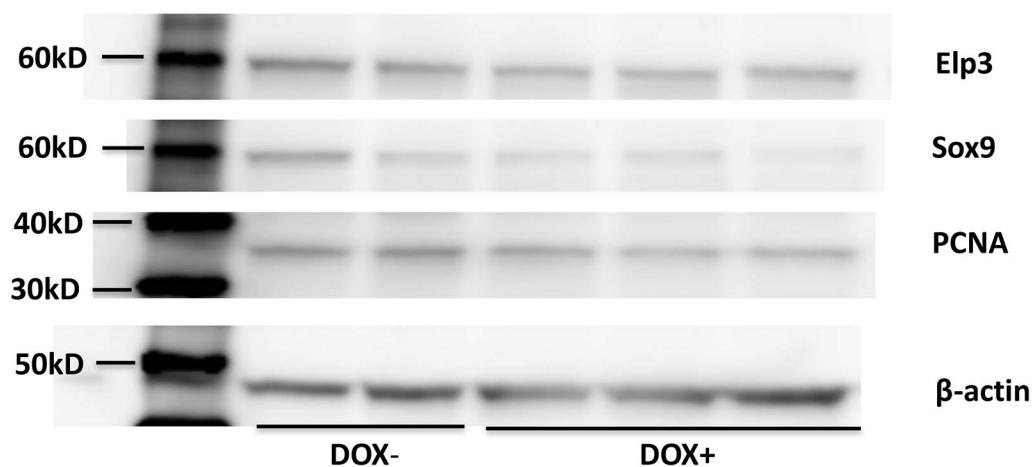

**Supplementary Fig.S8:** Western blot analyses for Sox9, PCNA, and Elp3 of tumor between overexpression of Dek or not .

Total protein extracts from tumor tissue sample of iDek mice treated with 4NQO and DOX (DOX+) or 4NQO only (DOX-). Indicated antibodies were used for Western blot analyses.
