# Supplementary material for: Promotion of cell proliferation by the proto‐oncogene DEK enhances oral squamous cell carcinogenesis through field cancerization
Source: PubMed Central journal article supplement (PMC5633549; doi:10.1002/cam4.1157), 2017-08-23
Supplement: CAM4-6-2424-s002.pdf [file CAM4-6-2424-s002.pdf]

Table S1

PCR Array Catalog #: PAMM-178Z

| Position | Unigene   | Refseq       | Symbol  | Description                                   | Gname              | RT2 Catalog |
|----------|-----------|--------------|---------|-----------------------------------------------|--------------------|-------------|
| A01      | Mm.289914 | NM_021421    | Angel2  | Angel homolog 2 (Drosophila)                  | 2610307I21Rik/573  | PPM37719A   |
| A02      | Mm.7214   | NM_013470    | Anxa3   | Annexin A3                                    | Anx3               | PPM25413B   |
| A03      | Mm.1620   | NM_009673    | Anxa5   | Annexin A5                                    | Anx5/R74653        | PPM04788A   |
| A04      | Mm.22478  | NM_001080819 | Arid1a  | AT rich interactive domain 1A (SWI-like)      | 1110030E03Rik/BA   | PPM26299C   |
| A05      | Mm.37623  | NM_022989    | Arl6ip6 | ADP-ribosylation factor-like 6 interacting p  | 2310057C01Rik/26   | PPM28462A   |
| A06      | Mm.29133  | NM_009773    | Bub1b   | Budding uninhibited by benzimidazoles 1 h     | AU045529/BUBR1     | PPM27461A   |
| A07      | Mm.439957 | NM_007572    | C1qa    | Complement component 1, q subcomponent        | AI255395/C1q       | PPM24525E   |
| A08      | Mm.2570   | NM_009777    | C1qb    | Complement component 1, q subcomponent        | -                  | PPM24831A   |
| A09      | Mm.439732 | NM_007574    | C1qc    | Complement component 1, q subcomponent        | AI385742/C1qg/Ciq  | PPM24975B   |
| A10      | Mm.219527 | NM_144938    | C1s1    | Complement component 1, s subcomponent        | AA959438/AI25519   | PPM41777B   |
| A11      | Mm.19131  | NM_009778    | C3      | Complement component 3                        | AI255234/ASP/HSE   | PPM04471E   |
| A12      | Mm.2408   | NM_009779    | C3ar1   | Complement component 3a receptor 1            | AZ3B/C3AR/HNFA     | PPM04821A   |
| B01      | Mm.439678 | NM_011413    | C4a     | Complement component 4A (Rodgers blood        | Slp/SlpA           | PPM68629A   |
| B02      | Mm.439678 | NM_009780    | C4b     | Complement component 4B (Childo blood g       | C4/Ss              | PPM05780A   |
| B03      | Mm.247623 | NM_007577    | C5ar1   | Complement component 5a receptor 1            | C5aR/C5r1/Cd88/D   | PPM34882A   |
| B04      | Mm.277665 | NM_009788    | Calb1   | Calbindin 1                                   | Brain-2/CB/Calb/C  | PPM05029B   |
| B05      | Mm.1051   | NM_009807    | Casp1   | Caspase 1                                     | ICE/II1bc          | PPM02921E   |
| B06      | Mm.274927 | NM_009912    | Ccr1    | Chemokine (C-C motif) receptor 1              | Cmkr1/Mip-1a-R     | PPM03174A   |
| B07      | Mm.3460   | NM_009841    | Cd14    | CD14 antigen                                  | -                  | PPM06249G   |
| B08      | Mm.37426  | NM_053094    | Cd163   | CD163 antigen                                 | CD163v2/CD163v3    | PPM06162B   |
| B09      | Mm.168789 | NM_009876    | Cdkn1c  | Cyclin-dependent kinase inhibitor 1C (P57)    | AL024410/CDKI/Ki   | PPM02895B   |
| B10      | Mm.8655   | NM_009888    | Cfh     | Complement component factor h                 | Mud-1/NOM/Sas-1    | PPM25501F   |
| B11      | Mm.220362 | NM_015780    | Cfhr1   | Complement factor H-related 1                 | AI194696/CFHRB/C   | PPM33724A   |
| B12      | Mm.200608 | NM_013492    | Clu     | Clusterin                                     | AI893575/ApoJ/Cli/ | PPM03567A   |
| C01      | Mm.103711 | NM_009142    | Cx3cl1  | Chemokine (C-X3-C motif) ligand 1             | AB030188/ABCD-3    | PPM02959F   |
| C02      | Mm.425692 | NM_023158    | Cxc16   | Chemokine (C-X-C motif) ligand 16             | 0910001K24Rik/AV   | PPM03775A   |
| C03      | Mm.119162 | NM_010485    | Elavl1  | ELAV (embryonic lethal, abnormal vision, D    | 2410055N02Rik/HU   | PPM30921A   |
| C04      | Mm.29719  | NM_028811    | Elp3    | Elongation protein 3 homolog (S. cerevisiae)  | 2610507P14Rik/KA   | PPM27815A   |
| C05      | Mm.236645 | NM_001043335 | Eml1    | Echinoderm microtubule associated protein     | 1110008N23Rik/A9   | PPM34360A   |
| C06      | Mm.258397 | NM_177821    | Ep300   | E1A binding protein p300                      | A430090G16/A7300   | PPM05448E   |
| C07      | Mm.152289 | NM_001164225 | Fbxl16  | F-box and leucine-rich repeat protein 16      | BC042620/Scirr1    | PPM31710A   |
| C08      | Mm.22673  | NM_010185    | Fcer1g  | Fc receptor, IgE, high affinity I, gamma poly | AI573376/CD23/Fc   | PPM04614E   |
| C09      | Mm.292276 | NM_001122603 | Fcgbp   | Fc fragment of IgG binding protein            | A430096B05Rik      | PPM41225A   |
| C10      | Mm.150    | NM_010186    | Fcgr1   | Fc receptor, IgG, high affinity I             | AI323638/AV09295   | PPM04014A   |
| C11      | Mm.425062 | NM_010187    | Fcgr2b  | Fc receptor, IgG, low affinity IIb            | AI528646/CD32/F6   | PPM04611F   |
| C12      | Mm.22119  | NM_010188    | Fcgr3   | Fc receptor, IgG, low affinity III            | CD16               | PPM04610G   |
| D01      | Mm.29891  | NM_019739    | Foxo1   | Forkhead box O1                               | AI876417/Afxh/FKH  | PPM03381C   |
| D02      | Mm.1239   | NM_010277    | Gfap    | Glial fibrillary acidic protein               | AI836096           | PPM04716A   |
| D03      | Mm.467426 | NM_008181    | Gsta1   | Glutathione S-transferase, alpha 1 (Ya)       | Gst2-1/OTTMUSG0    | PPM03858C   |
| D04      | Mm.347444 | NM_008296    | Hsf1    | Heat shock factor 1                           | AA960185/Hsf1alp   | PPM02939F   |
| D05      | Mm.334298 | NM_028708    | Jakmp3  | Janus kinase and microtubule interacting p    | 6330417G02Rik/AIS  | PPM35844A   |
| D06      | Mm.243014 | NM_019390    | Lmna    | Lamin A                                       | Dhe                | PPM34536A   |
| D07      | Mm.4105   | NM_010721    | Lmnb1   | Lamin B1                                      | -                  | PPM57673C   |
| D08      | Mm.7362   | NM_010722    | Lmnb2   | Lamin B2                                      | -                  | PPM25426E   |
| D09      | Mm.25642  | NM_025520    | Lsm5    | LSM5 homolog, U6 small nuclear RNA asso       | 2010208Q10Rik/23   | PPM26793A   |
| D10      | Mm.282359 | NM_008522    | Ltf     | Lactotransferrin                              | Csp82/Lf/MMS10R    | PPM04406A   |
| D11      | Mm.252063 | NM_010777    | Mbp     | Myelin basic protein                          | C76307/Hmbpr/R7    | PPM04745E   |
| D12      | Mm.44174  | NM_053164    | Mrpl43  | Mitochondrial ribosomal protein L43           | 4930442D21Rik/bM   | PPM29032A   |
| E01      | Mm.30084  | NM_019435    | Ndufb11 | NADH dehydrogenase (ubiquinone) 1 beta        | D5Bwg0566e/D5Bw    | PPM27724A   |
| E02      | Mm.142253 | NM_019482    | Panx1   | Pannexin 1                                    | AI847747           | PPM31514B   |
| E03      | Mm.24254  | NM_011051    | Pdcd6   | Programmed cell death 6                       | AV299538/AIg2/MA   | PPM26583A   |
| E04      | Mm.194486 | NM_001081080 | Phf3    | PHD finger protein 3                          | 2310061N19Rik/mH   | PPM32771B   |
| E05      | Mm.39001  | NM_172551    | Polrmt  | Polymerase (RNA) mitochondrial (DNA dire      | 1110018N15Rik/49   | PPM28596A   |

|          |         | Fold Change (comparing to control group) |                   |          |
|----------|---------|------------------------------------------|-------------------|----------|
|          |         | Group 1                                  |                   |          |
| Position | Symbol  | Fold Change                              | 95% CI            | Comments |
| A01      | Angel2  | 1.9917                                   | (1.51, 2.47)      | OKAY     |
| A02      | Anxa3   | 0.7541                                   | (0.47, 1.04)      | OKAY     |
| A03      | Anxa5   | 0.9945                                   | (0.78, 1.21)      | OKAY     |
| A04      | Arid1a  | 0.9699                                   | (0.00001, 2.28)   | OKAY     |
| A05      | Arl6ip6 | 1.3263                                   | (0.86, 1.79)      | OKAY     |
| A06      | Bub1b   | 1.0757                                   | (0.58, 1.57)      | OKAY     |
| A07      | C1qa    | 0.2711                                   | (0.00001, 1.60)   | OKAY     |
| A08      | C1qb    | 5.4667                                   | (1.70, 9.23)      | OKAY     |
| A09      | C1qc    | 6.2794                                   | (2.11, 10.45)     | OKAY     |
| A10      | C1s1    | 1.7137                                   | (0.01, 3.42)      | OKAY     |
| A11      | C3      | 5.5778                                   | (0.00001, 18.95)  | OKAY     |
| A12      | C3ar1   | 2.7504                                   | (0.00001, 8.13)   | OKAY     |
| B01      | C4a     | 3.4931                                   | (0.85, 6.14)      | A        |
| B02      | C4b     | 112.3269                                 | (0.00001, 399.13) | A        |
| B03      | C5ar1   | 3.7988                                   | (0.00001, 8.50)   | OKAY     |
| B04      | Calb1   | 5.6854                                   | (0.00001, 24.25)  | B        |
| B05      | Casp1   | 0.9298                                   | (0.74, 1.11)      | OKAY     |
| B06      | Ccr1    | 1.4652                                   | (0.00001, 4.62)   | OKAY     |
| B07      | Cd14    | 0.2167                                   | (0.00001, 1.28)   | OKAY     |
| B08      | CD163   | 94.1558                                  | (0.00001, 314.38) | A        |
| B09      | Cdkn1c  | 2.4094                                   | (0.00001, 5.72)   | OKAY     |
| B10      | Cfh     | 13.0993                                  | (0.00001, 33.67)  | OKAY     |
| B11      | Cfhr1   | 7.2628                                   | (0.00001, 29.86)  | B        |
| B12      | Clu     | 0.1999                                   | (0.00001, 0.81)   | OKAY     |
| C01      | Cx3cl1  | 0.7709                                   | (0.29, 1.25)      | OKAY     |
| C02      | Cxcl16  | 1.1593                                   | (0.29, 2.03)      | OKAY     |
| C03      | Elavl1  | 0.9282                                   | (0.56, 1.29)      | OKAY     |
| C04      | Elp3    | 1.4522                                   | (1.20, 1.71)      | OKAY     |
| C05      | Eml1    | 0.5995                                   | (0.22, 0.98)      | OKAY     |
| C06      | Ep300   | 0.0822                                   | (0.00001, 0.48)   | OKAY     |
| C07      | Fbxl16  | 2.5374                                   | (0.00001, 5.74)   | OKAY     |
| C08      | Fcer1g  | 1.675                                    | (1.10, 2.25)      | A        |
| C09      | Fcgbp   | 15.0611                                  | (0.00001, 72.68)  | A        |
| C10      | Fcgr1   | 14.1234                                  | (0.00001, 40.22)  | A        |
| C11      | Fcgr2b  | 4.4405                                   | (0.00001, 10.75)  | OKAY     |
| C12      | Fcgr3   | 0.8383                                   | (0.00001, 4.63)   | OKAY     |
| D01      | Foxo1   | 1.1202                                   | (0.63, 1.61)      | OKAY     |
| D02      | Gfap    | 0.9628                                   | (0.00001, 2.65)   | B        |
| D03      | Gsta1   | 1.2522                                   | (0.16, 2.34)      | OKAY     |
| D04      | Hsf1    | 1.1894                                   | (0.95, 1.43)      | OKAY     |
| D05      | Jakmp3  | 4.3829                                   | (0.00001, 14.82)  | B        |
| D06      | Lmna    | 0.7153                                   | (0.30, 1.13)      | OKAY     |
| D07      | Lmnb1   | 1.4435                                   | (0.65, 2.23)      | OKAY     |
| D08      | Lmnb2   | 2.1573                                   | (0.00001, 4.38)   | B        |
| D09      | Lsm5    | 2.2604                                   | (0.85, 3.67)      | OKAY     |
| D10      | Ltf     | 4.9457                                   | (0.00001, 19.93)  | OKAY     |
| D11      | Mbp     | 1.3166                                   | (0.00001, 2.75)   | OKAY     |
| D12      | Mrpl43  | 0.2069                                   | (0.00001, 0.88)   | OKAY     |
| E01      | Ndufb11 | 1.7865                                   | (1.16, 2.41)      | OKAY     |
| E02      | Panx1   | 1.6118                                   | (0.85, 2.38)      | OKAY     |
| E03      | Pdcd6   | 1.1093                                   | (0.72, 1.50)      | OKAY     |
| E04      | Phf3    | 1.4202                                   | (0.93, 1.91)      | OKAY     |
| E05      | Polrmt  | 0.967                                    | (0.57, 1.36)      | OKAY     |

|     |           |              |          |                                                           |                   |           |
|-----|-----------|--------------|----------|-----------------------------------------------------------|-------------------|-----------|
| E06 | Mm.274589 | NM_133931    | Pot1a    | Protection of telomeres 1A                                | 1500031H18Rik/AI8 | PPM36758A |
| E07 | Mm.365961 | NM_145541    | Rap1a    | RAS-related protein-1a                                    | A1848598/G-22K/K  | PPM05222A |
| E08 | Mm.287609 | NM_146042    | Rnf144b  | Ring finger protein 144B                                  | BC025007/E130105  | PPM37545A |
| E09 | Mm.21567  | NM_013650    | S100a8   | S100 calcium binding protein A8 (calgranulin A)           | 60B8Ag/AI323541/  | PPM05051F |
| E10 | Mm.2128   | NM_009114    | S100a9   | S100 calcium binding protein A9 (calgranulin B)           | 60B8Ag/AW546964/  | PPM05050E |
| E11 | Mm.229373 | NM_001014761 | Scn2b    | Sodium channel, voltage-gated, type II, beta 2            | 2810451E09Rik/AI8 | PPM41368B |
| E12 | Mm.351459 | NM_019812    | Sirt1    | Sirtuin 1 (silent mating type information regulator 1)    | AA673258/SIR2L1/  | PPM05054A |
| F01 | Mm.29760  | NM_022433    | Sirt3    | Sirtuin 3 (silent mating type information regulator 3)    | 2310003L23Rik/AI8 | PPM34583A |
| F02 | Mm.25643  | NM_181586    | Sirt6    | Sirtuin 6 (silent mating type information regulator 6)    | 2810449N18Rik/AI6 | PPM26794A |
| F03 | Mm.152699 | NM_010754    | Smad2    | MAD homolog 2 (Drosophila)                                | 7120426M23Rik/M   | PPM04430C |
| F04 | Mm.245715 | NM_009222    | Snap23   | Synaptosomal-associated protein 23                        | 23kDa/AA408749/S  | PPM04251A |
| F05 | Mm.4306   | NM_009352    | Terf1    | Telomeric repeat binding factor 1                         | Pin2/Trb1/Trf1    | PPM04758A |
| F06 | Mm.6402   | NM_009353    | Terf2    | Telomeric repeat binding factor 2                         | TRF2              | PPM05430E |
| F07 | Mm.229292 | NM_009360    | Tfam     | Transcription factor A, mitochondrial                     | A1661103/Hmgt3/m  | PPM39096B |
| F08 | Mm.226554 | NM_146074    | Tfb1m    | Transcription factor B1, mitochondrial                    | A1429207          | PPM34025A |
| F09 | Mm.390474 | NM_008249    | Tfb2m    | Transcription factor B2, mitochondrial                    | Hkp1              | PPM38181A |
| F10 | Mm.29346  | NM_145705    | Tinf2    | Terf1 (TRF1)-interacting nuclear factor 2                 | AW552114/D14Wsl   | PPM37266A |
| F11 | Mm.87596  | NM_011905    | Tlr2     | Toll-like receptor 2                                      | Ly105             | PPM04220B |
| F12 | Mm.38049  | NM_021297    | Tlr4     | Toll-like receptor 4                                      | Lps/Ly87/Ran/M1/  | PPM04207E |
| G01 | Mm.208477 | NM_028343    | Tmem135  | Transmembrane protein 135                                 | 2810439K08Rik/AW  | PPM33200A |
| G02 | Mm.23217  | NM_028975    | Tmem33   | Transmembrane protein 33                                  | 1110006G02Rik/16  | PPM26408A |
| G03 | Mm.103551 | NM_023764    | Tollip   | Toll interacting protein                                  | 4930403G24Rik/49  | PPM06269E |
| G04 | Mm.20837  | NM_009906    | Tpp1     | Tripeptidyl peptidase I                                   | Cln2/TPP-1        | PPM26098C |
| G05 | Mm.410189 | NM_023719    | Txnip    | Thioredoxin interacting protein                           | 1200008J08Rik/AA6 | PPM05656C |
| G06 | Mm.241454 | NM_177184    | Vps13c   | Vacuolar protein sorting 13C (yeast)                      | A1552542/AV02604  | PPM32619A |
| G07 | Mm.290950 | NM_172767    | Vwa5a    | Von Willebrand factor A domain containing 5               | 5830475I06Rik/AW  | PPM37846A |
| G08 | Mm.228805 | NM_011721    | Wrn      | Werner syndrome homolog (human)                           | A1846146          | PPM05058C |
| G09 | Mm.103262 | NM_177660    | Zbtb10   | Zinc finger and BTB domain containing 10                  | 4832414A18/AU023  | PPM30607A |
| G10 | Mm.106970 | NM_011763    | Zfp9     | Zinc finger protein 9                                     | 1810048F22Rik/AU  | PPM30728A |
| G11 | Mm.273496 | NM_011767    | Zfr      | Zinc finger RNA binding protein                           | C920030H05Rik     | PPM36666A |
| G12 | Mm.34399  | NM_172700    | Zmpste24 | Zinc metalloproteinase, STE24 homolog (S. cerevisiae)     | A5300430I5Rik/DO  | PPM28203A |
| H01 | Mm.328431 | NM_007393    | Actb     | Actin, beta                                               | Actx/E430023M04R  | PPM02945B |
| H02 | Mm.163    | NM_009735    | B2m      | Beta-2 microglobulin                                      | Ly-m11/beta2-m/b  | PPM03562A |
| H03 | Mm.309092 | NM_008084    | Gapdh    | Glyceraldehyde-3-phosphate dehydrogenase                  | Gapd              | PPM02946E |
| H04 | Mm.3317   | NM_010368    | Gusb     | Glucuronidase, beta                                       | A1747421/Gur/Gus  | PPM05490C |
| H05 | Mm.2180   | NM_008302    | Hsp90ab1 | Heat shock protein 90 alpha (cytosolic), class B member 1 | 90kDa/AL022974/C  | PPM04803F |
| H06 | N/A       | SA_00106     | MGDC     | Mouse Genomic DNA Contamination                           | MIGX1B            |           |
| H07 | N/A       | SA_00104     | RTC      | Reverse Transcription Control                             | RTC               | PPX63340A |
| H08 | N/A       | SA_00104     | RTC      | Reverse Transcription Control                             | RTC               | PPX63340A |
| H09 | N/A       | SA_00104     | RTC      | Reverse Transcription Control                             | RTC               | PPX63340A |
| H10 | N/A       | SA_00103     | PPC      | Positive PCR Control                                      | PPC               |           |
| H11 | N/A       | SA_00103     | PPC      | Positive PCR Control                                      | PPC               |           |
| H12 | N/A       | SA_00103     | PPC      | Positive PCR Control                                      | PPC               |           |

|     |          |         |                    |      |
|-----|----------|---------|--------------------|------|
| E06 | Pot1a    | 0.127   | ( 0.00001, 0.66 )  | OKAY |
| E07 | Rap1a    | 1.928   | ( 1.09, 2.77 )     | OKAY |
| E08 | Rnf144b  | 1.7739  | ( 0.86, 2.69 )     | OKAY |
| E09 | S100a8   | 4.246   | ( 0.00001, 13.21 ) | OKAY |
| E10 | S100a9   | 2.8736  | ( 0.00001, 9.90 )  | OKAY |
| E11 | Scn2b    | 11.7429 | ( 0.00001, 54.11 ) | B    |
| E12 | Sirt1    | 0.1744  | ( 0.00001, 0.98 )  | OKAY |
| F01 | Sirt3    | 1.5708  | ( 0.92, 2.22 )     | OKAY |
| F02 | Sirt6    | 0.9151  | ( 0.51, 1.32 )     | OKAY |
| F03 | Smad2    | 1.314   | ( 0.87, 1.75 )     | OKAY |
| F04 | Snap23   | 1.0494  | ( 0.53, 1.57 )     | OKAY |
| F05 | Terf1    | 0.5061  | ( 0.00001, 1.46 )  | OKAY |
| F06 | Terf2    | 0.7053  | ( 0.00001, 1.55 )  | OKAY |
| F07 | Tfam     | 1.626   | ( 1.29, 1.96 )     | OKAY |
| F08 | Tfb1m    | 1.3328  | ( 0.20, 2.47 )     | OKAY |
| F09 | Tfb2m    | 1.6979  | ( 1.27, 2.13 )     | OKAY |
| F10 | Tinf2    | 1.2934  | ( 0.83, 1.76 )     | OKAY |
| F11 | Tlr2     | 1.6067  | ( 0.99, 2.62 )     | OKAY |
| F12 | Tlr4     | 0.1402  | ( 0.00001, 0.79 )  | OKAY |
| G01 | Tmem135  | 1.6377  | ( 0.80, 2.47 )     | OKAY |
| G02 | Tmem33   | 0.7978  | ( 0.16, 1.43 )     | OKAY |
| G03 | Tollip   | 1.3141  | ( 0.93, 1.70 )     | OKAY |
| G04 | Tpp1     | 0.9645  | ( 0.47, 1.46 )     | OKAY |
| G05 | Txnip    | 1.9411  | ( 0.00001, 6.56 )  | OKAY |
| G06 | Vps13c   | 0.2229  | ( 0.00001, 1.19 )  | OKAY |
| G07 | Vwa5a    | 2.5065  | ( 0.72, 4.29 )     | OKAY |
| G08 | Wrn      | 1.4362  | ( 0.93, 1.94 )     | OKAY |
| G09 | Zbtb10   | 4.2968  | ( 0.00001, 10.31 ) | OKAY |
| G10 | Zfp9     | 1.8668  | ( 0.17, 3.56 )     | OKAY |
| G11 | Zfr      | 0.0794  | ( 0.00001, 0.50 )  | OKAY |
| G12 | Zmpste24 | 0.128   | ( 0.00001, 0.70 )  | OKAY |
| H01 | Actb     | 0.846   | ( 0.48, 1.21 )     | OKAY |
| H02 | B2m      | 3.2628  | ( 0.39, 6.14 )     | OKAY |
| H03 | Gapdh    | 0.929   | ( 0.45, 1.41 )     | OKAY |
| H04 | Gusb     | 1.4818  | ( 0.88, 2.08 )     | OKAY |
| H05 | Hsp90ab1 | 0.3899  | ( 0.00001, 1.06 )  | OKAY |
| H06 | MGDC     | 1.7309  | ( 0.00001, 6.09 )  | C    |
| H07 | RTC      | 0.924   | ( 0.20, 1.64 )     | OKAY |
| H08 | RTC      | 0.9141  | ( 0.21, 1.62 )     | OKAY |
| H09 | RTC      | 0.924   | ( 0.21, 1.64 )     | OKAY |
| H10 | PPC      | 0.9355  | ( 0.43, 1.44 )     | OKAY |
| H11 | PPC      | 0.1389  | ( 0.00001, 0.66 )  | OKAY |
| H12 | PPC      | 0.0341  | ( 0.00001, 0.28 )  | OKAY |
