# Supplementary material for: Promotion of cell proliferation by the proto‐oncogene DEK enhances oral squamous cell carcinogenesis through field cancerization
Source: PubMed Central journal article supplement (PMC5633549; doi:10.1002/cam4.1157), 2017-08-23
Supplement: CAM4-6-2424-s003.pdf [file CAM4-6-2424-s003.pdf]

Table S2. Primers used for quantitative real-time PCR.

| Target gene  | Primer sequences (5'-3')                             | PCR products (bp) |
|--------------|------------------------------------------------------|-------------------|
| <i>Elp3</i>  | F:CAGTCCCTCCTCACTATCGAA<br>R:TCTGTGGGGTTTGCACATCAC   | 107               |
| <i>Sox9</i>  | F:AGTACCCGCATCTGCACAAC<br>R:ACGAAGGGTCTCTTCTCGCT     | 88                |
| <i>Pcna</i>  | F:TTGCACGTATATGCCGAGACC<br>R:GGTGAACAGGCTCATTCTCTCT  | 183               |
| <i>Ptgs2</i> | F:TTCCAATCCATGTCAAACCGT<br>R:AGTCCGGGTACAGTCACACTT   | 76                |
| <i>Mcm2</i>  | F:ATCCACCACCGCTTCAAGAAC<br>R:TACCACCAAACCTCTCACGGTT  | 114               |
| <i>Cdc6</i>  | F:GACACAAGCTACCATCGGTTT<br>R:CAGGCTGGACGTTTCTAAGTTT  | 101               |
| <i>Mcm3</i>  | F:AGCGCAGAGAGACTACTTGGA<br>R:GCGGTTAGCCCTCTTTTCATTC  | 151               |
| <i>Mcm4</i>  | F:TCTTTGACCGTTATCCTGACTCC<br>R:TGCCTCGATCTATCTCCACCC | 228               |
